# Supplementary material
Source: PubMed Central journal article supplement (PMC6333511)
Supplement: NIHMS1516536-supplement-1.pdf [file NIHMS1516536-supplement-1.pdf]

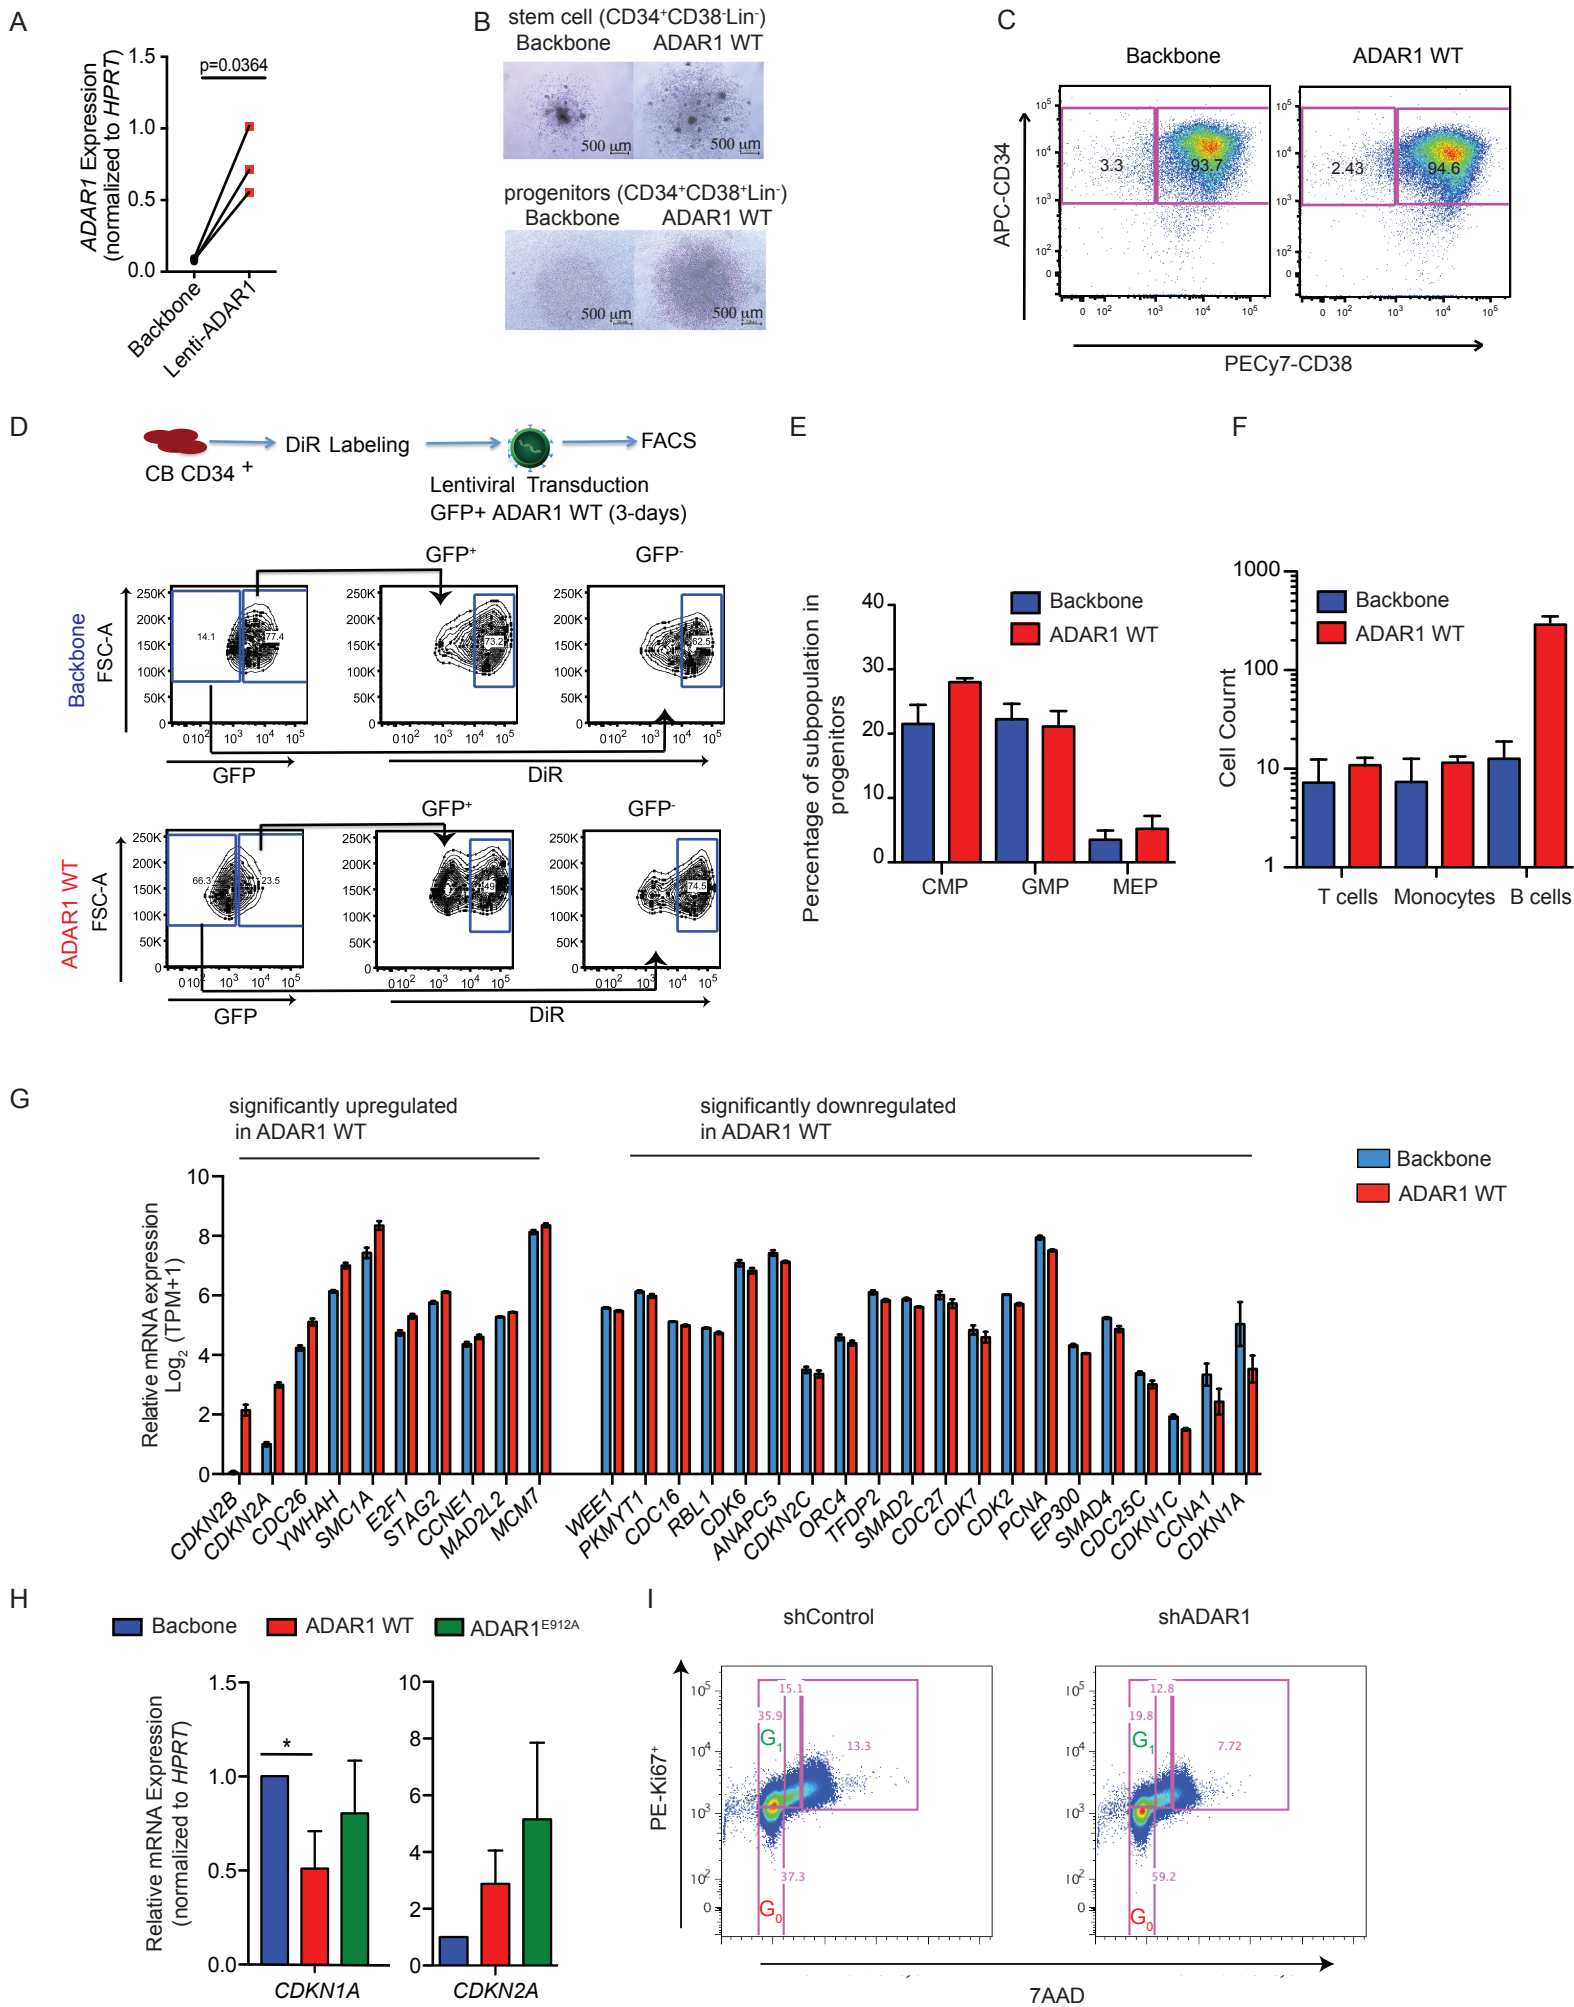

**Figure S1, related to Figure 1. ADAR1 overexpression and knockdown in normal HSPC.**

(A) Expression of lenti-ADAR1 WT in normal cord blood CD34<sup>+</sup> cells as measured by RT-qPCR (n=3). (B) Representative bright-field (BF) microscopy showing normal cord blood stem cells and progenitors transduced with lentiviral vector backbone or human ADAR1 WT lentivirus. (C) Experimental design and examples of FACS gates of DiR tracing of cord blood cells. (D) Flow analysis of stem and progenitor cells in backbone or ADAR1 WT transduced cord blood CD34<sup>+</sup> cells (n=3). (E) Percentage of sub-population of progenitors including CMP, GMP, and MEP in backbone or ADAR1 WT transduced cord blood CD34<sup>+</sup> HSPC (n=3). (F) Cell number of T cell, B cell and monocytes differentiated from cord blood CD34<sup>+</sup> HSPC transduced with backbone or ADAR1 WT (n=3). (G) Significantly differentially expressed transcripts of KEGG Cell Cycle Pathway in ADAR1 WT-transduced cord blood CD34<sup>+</sup> HSPC versus lentiviral vector control by RNA-seq analysis (n=3). The TPM gene expression value was transformed to  $\text{Log}_2(\text{TPM}+1)$ . (H) Examination of *CDKN1A* and *CDKN2A* mRNA expression by RT-qPCR in cord blood CD34<sup>+</sup> HSPC transduced with backbone, ADAR1 WT, or ADAR1<sup>E912A</sup> (n=4). (I) Representative cell cycle flow cytometry plot of normal cord blood CD34<sup>+</sup> HSPC transduced with shControl or shADAR1 measured by Ki-67 and 7AAD levels. All graphs show mean with SEM and statistical analysis was calculated using the Student's t-test. \*p<0.05.

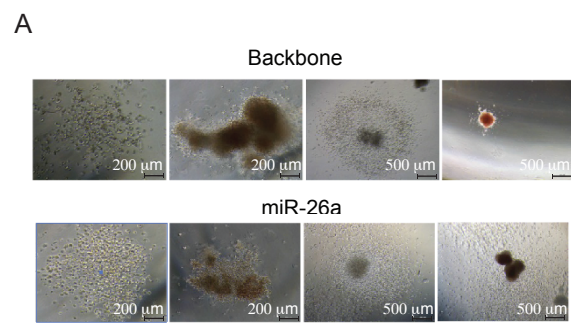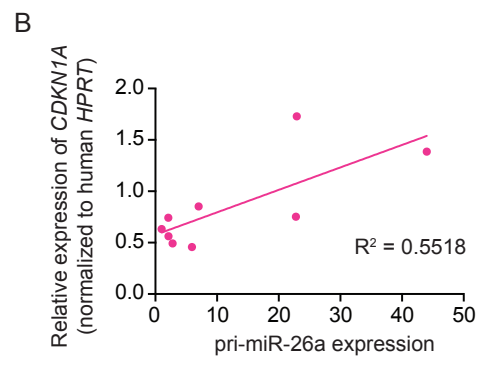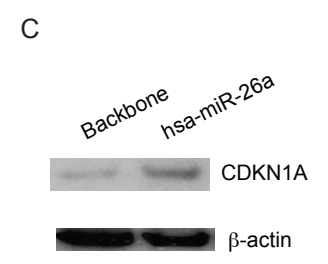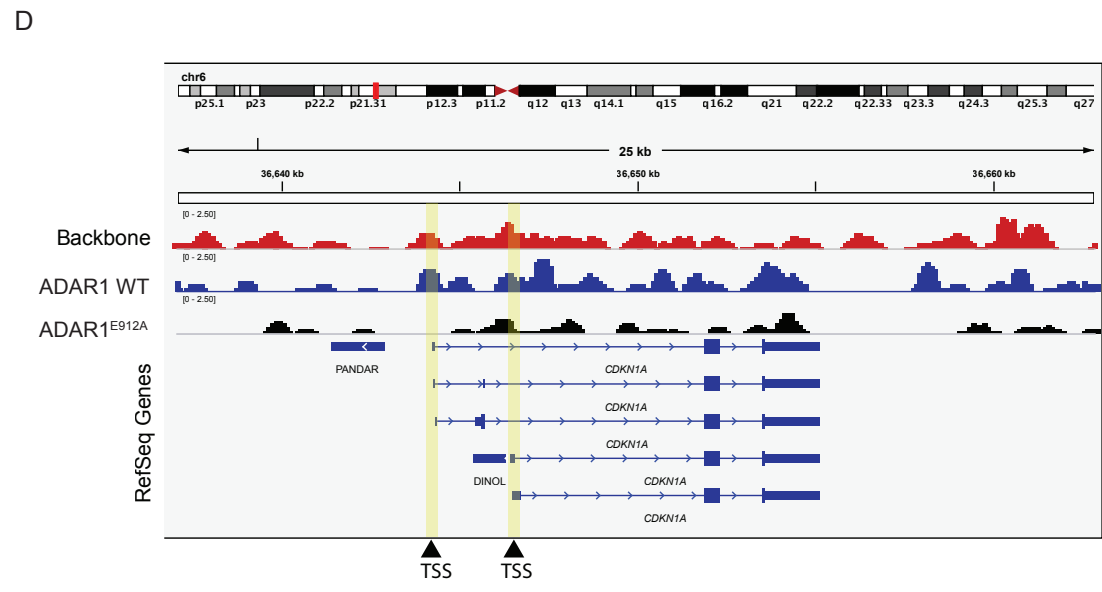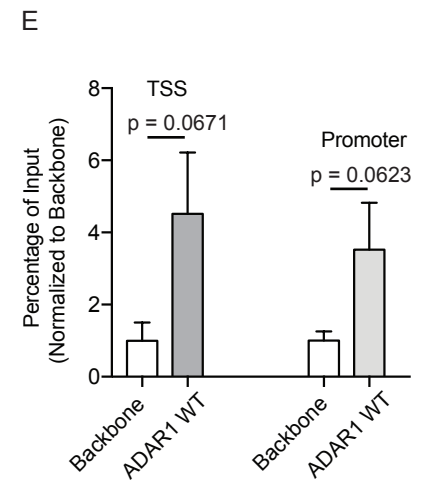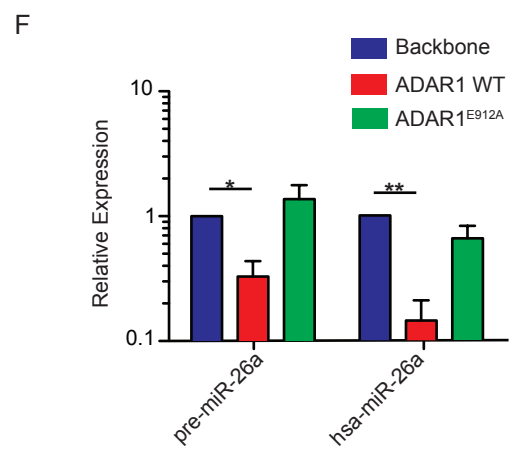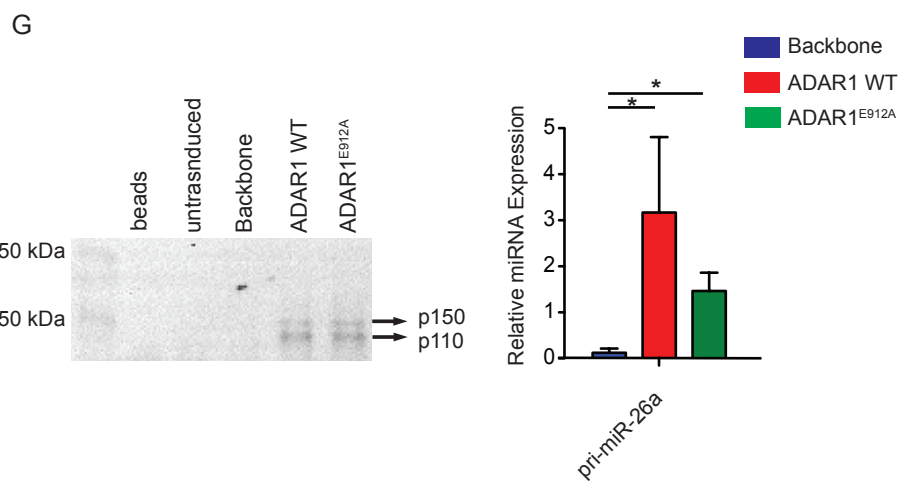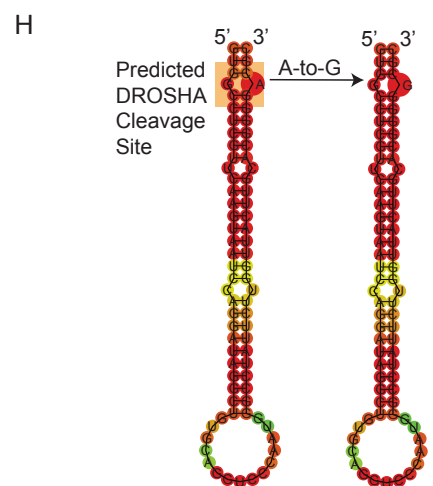

**Figure S2, related to Figure 3. MiR-26a regulated normal HSPC cell cycle transit and self-renewal.**

(A) Representative pictures of cord blood HSPC colonies. (B) Pearson's correlation of pri-miR-26a and *CDKN1A* expression as measured by RT-qPCR in HEK293T cells transduced with hsa-miR-26a lentivirus (n=9 experimental repeats). (C) Western blot analysis of *CDKN1A* protein expression HEK293T cells transduced with hsa-miR-26a lentivirus. (D) Representative H3K27me3 CHIP-sequencing plot in cord blood CD34<sup>+</sup> HSPC transduced with backbone, ADAR1 WT or ADAR1<sup>E912A</sup>. The transcription start sites (TSS) were highlighted. (E) H3K27me3 CHIP-qPCR of *CDKN1A* TSS and promoter regions in HEK293T cells transduced with backbone or ADAR1 WT (n=7-8 experimental replicates). (F) Expression of pre- and mature miR-26a was measured by RT-qPCR in K562 transduced with backbone, ADAR1 WT, or ADAR1<sup>E912A</sup> (n=3 experimental triplicate). (G) Crosslinking RNA Immunoprecipitation (CLIP) with an ADAR1 antibody followed by RT-qPCR analysis of pri-miR-26a in K562 cells stably expressing backbone, ADAR1 WT, or ADAR1<sup>E912A</sup> (n=3 experimental triplicate). (H) ViennaRNA-predicted secondary structure of pri-miR-26a with either adenosine or inosine (guanosine) at the predicted DGCR8/DROSHA cleavage site (highlighted in orange). All graphs show mean with SEM and statistical analysis was calculated using the Student's t-test. \*p<0.05, \*\*p<0.005.



A

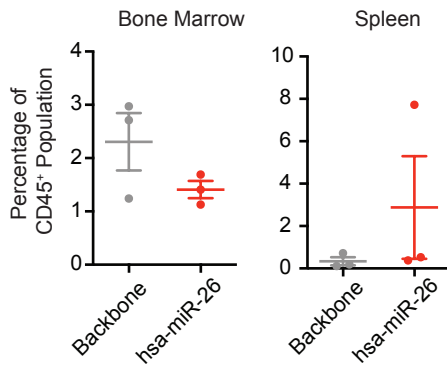

B

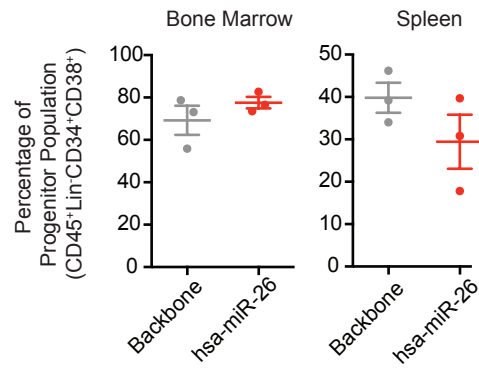

C

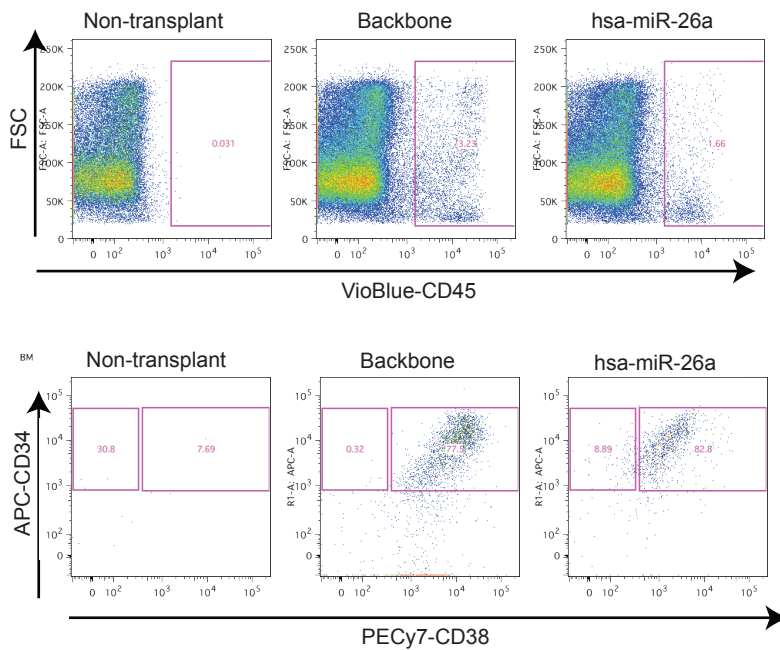

D

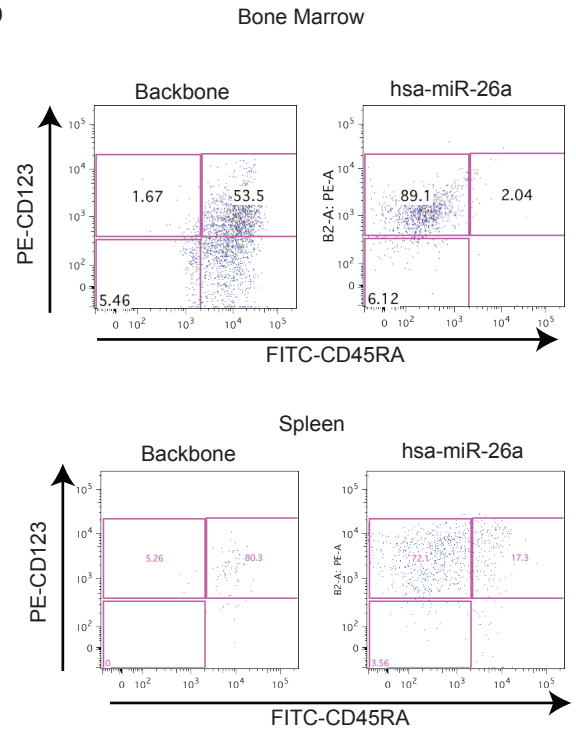

E

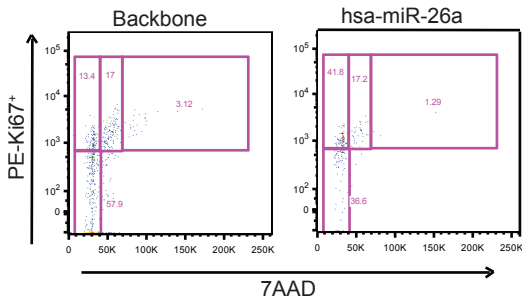

F

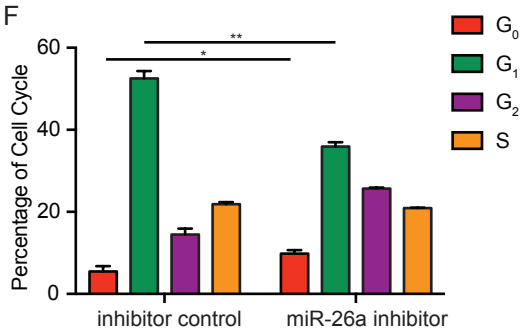

G

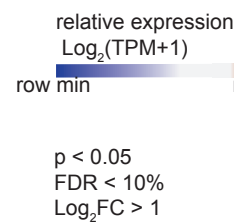

H

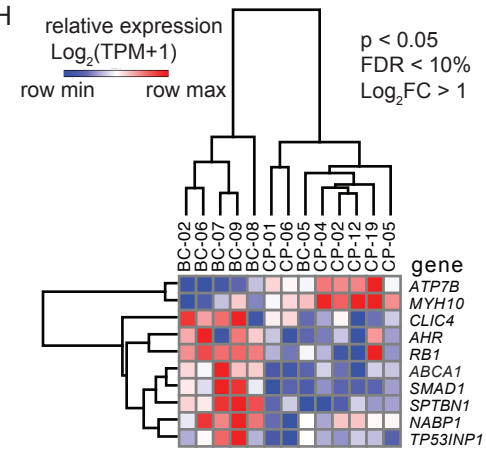

I

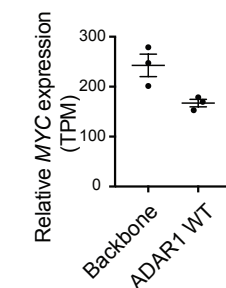

J

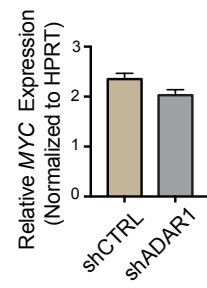

**Figure S3, related to Figure 4. Differential effect of miR-26a overexpression on normal HSPC and CML progenitors.**

(A and B) Percentage of human CD45<sup>+</sup> (A) or progenitor (CD45<sup>+</sup>Lin<sup>-</sup>CD34<sup>+</sup>CD38<sup>+</sup>) (B) engraftment in bone marrow and spleen of BC CML xenografted mice (n=3 mice per group). (C) Representative flow showing human CD45<sup>+</sup> and progenitor engraftment of BC CML cells transduced with backbone or hsa-miR-26a in bone marrow. (D) Representative GMP engraftment (% of parent cells) of BC CML cells transduced with backbone or hsa-miR-26a in bone marrow and spleen. (E) Representative cell cycle flow of engrafted human CD45<sup>+</sup> BC CML cells transduced with backbone and hsa-miR-26a in bone marrow. (F) Cell cycle flow analysis of K562 cells transfected with inhibitor control or a miR-26a inhibitor (n=3 experimental triplicate). (G) RNA-seq quantification of differentially expressed genes (Log<sub>2</sub> Fold Change > 1, p < 0.05, FDR < 0.10) corresponding to miR-26a targets from miRTarBase in cord blood transduced with lentiviral backbone control or ADAR1 WT (n=3). (H) Differentially expressed miR-26a targets (Log<sub>2</sub> Fold Change > 1, p < 0.05, FDR < 0.10) in BC progenitors (n=6) compared to CP counterparts (n=7) by RNA-seq analysis. (I and J) MYC expression was determined by RNA-seq in cord blood CD34<sup>+</sup> cells overexpressing ADAR1 WT (n=3) (I) or by RT-qPCR in cord blood CD34<sup>+</sup> cells with ADAR1 knockdown (n=3) (J). The graph shows mean with SEM and statistical analysis was calculated using the Student's t-test. \*p<0.05, \*\*p<0.005.

A

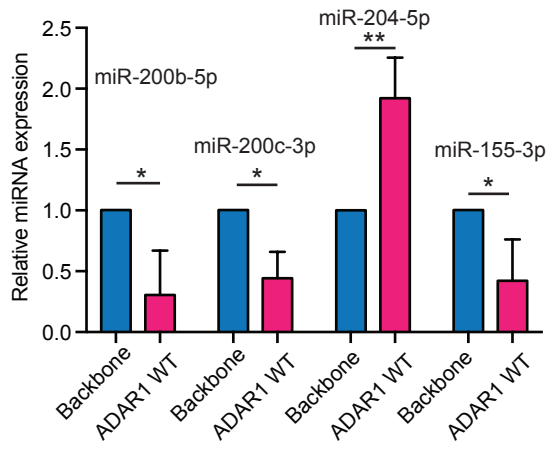

B

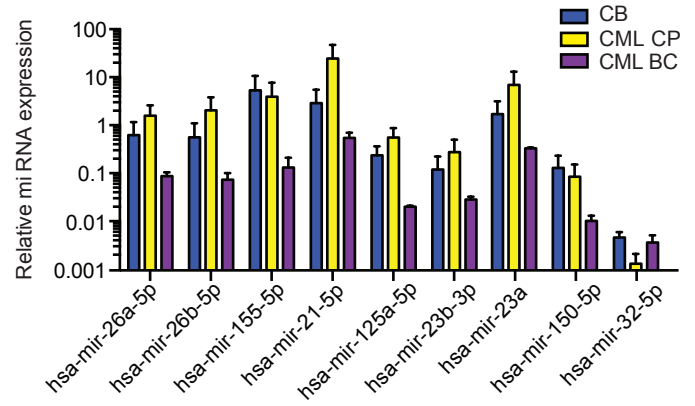

C

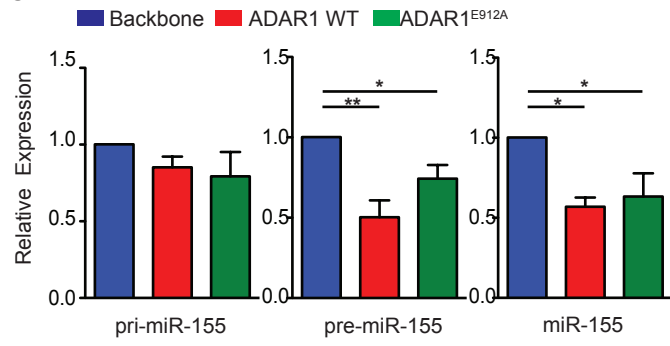

D

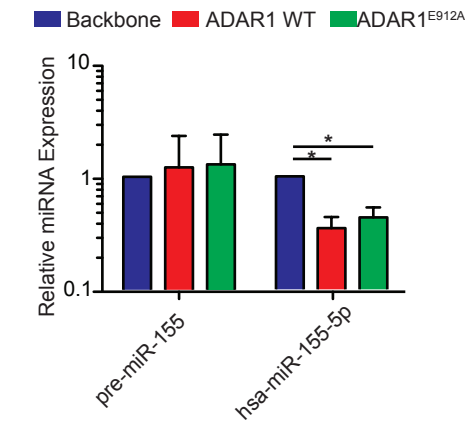

E

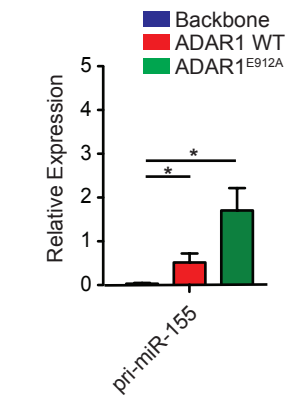

F

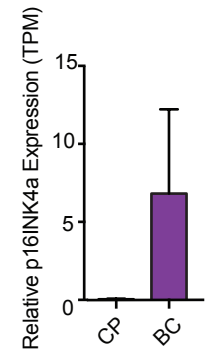

G

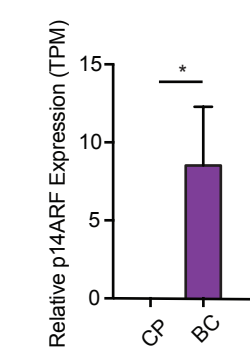

H

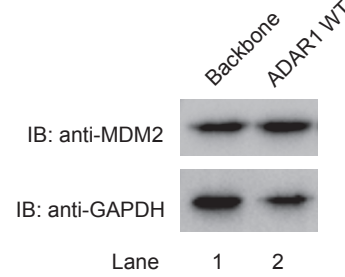

I

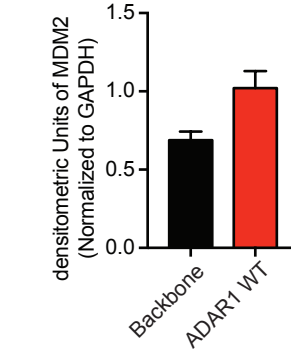

**Figure S4, related to Figure 5. ADAR1 regulates MDM2 3'UTR targeting and miRNA biogenesis in CML progenitors.**

(A) miRNome array-derived expression of miRNAs that were predicted to bind to MDM2 3'UTR region in cord blood CD34<sup>+</sup> HSPC overexpressing ADAR1 WT or ADAR1<sup>E912A</sup> compared with vector control (n=3-4). (B) Relative miRNA expression determined by miRNA qPCR array of 84 miRNAs in cord blood, CML CP, and CML BC CD34<sup>+</sup> cells (n=3 per patient group). (C) The expression of pri-, pre- and mature miR-155 transcripts evaluated by RT-qPCR in cord blood CD34<sup>+</sup> HSPCs transduced with backbone, ADAR1 WT, or ADAR1<sup>E912A</sup> (n=3). (D) Expression of pre- and mature miR-155 in K562 cells stably expressing backbone, ADAR1 WT, or ADAR1<sup>E912A</sup> (n=3 experiment triplicate). (E) Relative expression of pri-miR-155 compared to loading controls in crosslinking RNA Immunoprecipitation (CLIP) with an ADAR1 antibody in K562 stably transduced with backbone, ADAR1 WT, or ADAR1<sup>E912A</sup>. (F and G) The expression of *CDKN2A* transcripts, p16INK4a (F) and p14ARF (G), determined by RNA-seq in progenitor population of normal peripheral blood (NPB), CML CP (n=7), and CML BC (n=6). (H) Representative western blot showing MDM2 protein expression in CP CML CD34<sup>+</sup> cells transduced with backbone or ADAR1 WT. (I) Densitometry analysis of MDM2 protein level in CP CML CD34<sup>+</sup> cells transduced with backbone or ADAR1 WT (n=2). All graph show mean with SEM and statistical analysis was calculated using the Student's t-test. \*p<0.05, \*\*p<0.005.

**Table S4, related to STAR METHODS. CML patient sample information**

| Patient ID | Diagnosis | Treatment                      | Gender / Age | Date         | WBC count (K/mm <sup>3</sup> ) | % Blast (PB) |
|------------|-----------|--------------------------------|--------------|--------------|--------------------------------|--------------|
| CP-01      | CML CP    | None                           | M / 60       | 13-Nov. 2008 | 189                            | <5           |
| CP-02      | CML CP    | None                           | F / 63       | 23-May 2008  | 326                            | 5            |
| CP-04      | CML CP    | None                           | M / 44       | 14-Oct. 2008 | 306                            | 5.8          |
| CP-05      | CML CP    | None                           | M / 26       | 21-Sep. 2009 | 231                            | <1           |
| CP-06      | CML CP    | None                           | F / 62       | 25-Sep. 2009 | 87.7                           | <5           |
| CP-12      | CML CP    | None                           | N/A          | 26-Aug. 2009 | 390                            | <5           |
| CP-19      | CP        | None                           | M / 40       | 20-Oct. 2010 | 221                            | 13           |
| BC-02      | CML BC    | None                           | M / 34       | 26-Aug. 2004 | 241                            | 92           |
| BC-05      | CML BC    | None                           | M / 43       | 8-Dec. 2003  | 82.4                           | 32           |
| BC-06      | CML BC    | Hydroxyurea                    | M / 30       | 26-Oct. 1993 | 170                            | 94           |
| BC-07      | CML BC    | Hydroxyurea                    | M / 48       | 29-Oct. 1993 | 209                            | 86           |
| BC-08      | CML BC    | Hydroxyurea                    | M / 53       | 27-Jul. 2000 | 98                             | 82.6         |
| BC-09      | CML BC    | None                           | M / 65       | 17-Oct. 1991 | 72                             | 42           |
| BC-11      | CML BC    | Hydroxyurea                    | M / 31       | 16-Mar. 2006 | 40.1                           | 79           |
| BC-19      | CML BC    | Imatinib followed by dasatinib | M / 46       | 23-Nov. 2007 | 127                            | 30           |

**Table S5, related to STAR METHODS. List of RT-qPCR primers.**

| Transcript  | FW primer (5'-3')               | Rev primer (5'-3')              |
|-------------|---------------------------------|---------------------------------|
| Lenti-ADAR1 | AAA AAG CAG GCT CCA CCA T       | AAA AAG CAG GCT CCA CCA T       |
| Total ADAR1 | TGC TGC TGA ATT CAA GTT GG      | TCG TTC TCC CCA ATC AAG AC      |
| CDKN1A      | ATG AAA TTC ACC CCC TTT CC      | AGG TGA GGG GAC TCC AAA GT      |
| CDKN2A      | ATA TGC CTT CCC CCA CTA CC      | CGT GAG TGC TCA CTC CAG AA      |
| MDM2        | TTC CCA GCC TAG GTT TCA GA      | AAC ACG GAG CTT GAG AGG AA      |
| pri-miR-26a | GCC CAA TGG CAT AGC AAG A       | GGC CAG TCA TGC TTA CAG TCA C   |
| pri-miR-155 | AGC TTT ATA ACC GCA TGT GCA TAC | CAG ATT TCC CCT TCC TGG TTT     |
| HPRT        | TCA GGG ATT TGA ATC ATG TTT GTG | CGA TGT CAA TAG GAC TCC AGA TG  |
| CDKN1A Prom | CTT CTC TGA GCC CCA GTT TCC     | GGA TTT GAC GAG TGA GTT GTC TGT |
| CDKN1A TSS  | CGC GAG GAT GCG TGT TC          | CAT TCA CCT GCC GCA GAA A       |
